# Supplementary material for: Attitudes Toward Mental Health Help Seeking as Predictors of Future Help-Seeking Behavior and Use of Mental Health Treatments
Source: Atypon-hosted journal article supplement (doi:10.1176/appi.ps.201500164), 2016-02-14
Supplement: appi.ps.201500164.ds001.pdf [file appi.ps.201500164.ds001.pdf]

**Appendix Table A:** Multivariable analyses of the association of attitudes towards mental health help-seeking and beliefs about the benefits of mental health treatments at baseline with professional mental health help-seeking and use of mental health treatments over the follow-up in National Comorbidity Survey (1990-1992) and National Comorbidity Survey Follow-up (2001-2003). Analyses are limited to 2,784 participants who met the criteria for a mood, anxiety or substance use disorder during the follow-up.

| Baseline attitudes and beliefs                                                       | Mental health help-seeking during the follow-up |            |                                  |           |                                    |            |                          |           | Prescription psychiatric medication |             | Psychological counseling/therapy |           |
|--------------------------------------------------------------------------------------|-------------------------------------------------|------------|----------------------------------|-----------|------------------------------------|------------|--------------------------|-----------|-------------------------------------|-------------|----------------------------------|-----------|
|                                                                                      | Any professional help-seeking                   |            | From mental health professionals |           | From general medical professionals |            | From other professionals |           |                                     |             |                                  |           |
|                                                                                      | AOR <sup>a</sup>                                | 99% CI     | AOR <sup>a</sup>                 | 99% CI    | AOR <sup>a</sup>                   | 99% CI     | AOR <sup>a</sup>         | 99% CI    | AOR <sup>a</sup>                    | 99% CI      | AOR <sup>a</sup>                 | 99% CI    |
| Will go for professional help for serious emotional problem                          | 1.38                                            | 1.04-1.83* | 1.31                             | 0.98-1.75 | 1.64                               | 1.07-2.50* | 0.91                     | 0.35-2.38 | 1.75                                | 1.19-2.55** | 1.18                             | 0.91-1.53 |
| Comfortable talking about personal problems with a professional                      | 1.24                                            | 0.94-1.63  | 1.32                             | 0.95-1.83 | 1.24                               | 0.79-1.94  | 1.54                     | 0.38-6.24 | 1.26                                | 0.86-1.86   | 1.25                             | 0.89-1.75 |
| Embarrassed if friends knew about getting professional help                          | 1.04                                            | 0.82-1.31  | 1.12                             | 0.87-1.44 | 1.01                               | 0.72-1.44  | 1.42                     | 0.87-2.32 | 0.99                                | 0.73-1.35   | 1.10                             | 0.85-1.42 |
| What percent of people who see a professional are helped? <sup>b</sup>               | 0.01                                            | 0.90-1.13  | 0.99                             | 0.87-1.13 | 1.05                               | 0.92-1.21  | 0.86                     | 0.67-1.12 | 1.05                                | 0.92-1.19   | 1.00                             | 0.88-1.14 |
| What percent of people who do not get professional help get better? <sup>b</sup>     | 1.07                                            | 0.94-1.21  | 1.03                             | 0.90-1.17 | 1.20                               | 0.90-1.39  | 1.05                     | 0.73-1.51 | 1.05                                | 0.84-1.32   | 1.04                             | 0.91-1.18 |
| Difference in percent who get better with professional help vs. without <sup>b</sup> | 0.98                                            | 0.91-1.06  | 0.97                             | 0.89-1.07 | 1.01                               | 0.88-1.17  | 0.90                     | 0.72-1.14 | 1.04                                | 0.91-1.19   | 0.97                             | 0.89-1.06 |

**Note:** AOR stands for adjusted odds ratio, CI for confidence interval.

<sup>a</sup> Based on coefficients from logistic regression models in which each attitude/belief variable was entered into a separate model adjusting for sex, race/ethnicity, baseline age, education, employment, family income, health insurance, mood, anxiety or substance disorders, level of interference, suicidal ideations, plans or suicide attempts, professional mental health help-seeking, follow-up psychiatric disorders, interference, suicidal ideation, plans and suicide attempts.

<sup>b</sup> The AORs represent change in outcome for every 10% increments in independent variables.

**Appendix Table B:** Multivariable analyses of the association of attitudes towards mental health help-seeking and beliefs about the benefits of mental health treatments at baseline with professional mental health help-seeking and use of mental health treatments over the follow-up in National Comorbidity Survey (1990-1992) and National Comorbidity Survey Follow-up (2001-2003). Analyses are limited to 2,217 participants who did not meet the criteria for a mood, anxiety or substance use disorder during the follow-up.

| Baseline attitudes and beliefs                                                       | Mental health help-seeking during the follow-up |           |                                  |           |                                    |           |                          |           | Prescription psychiatric medication |            | Psychological counseling/therapy |           |
|--------------------------------------------------------------------------------------|-------------------------------------------------|-----------|----------------------------------|-----------|------------------------------------|-----------|--------------------------|-----------|-------------------------------------|------------|----------------------------------|-----------|
|                                                                                      | Any professional help-seeking                   |           | From mental health professionals |           | From general medical professionals |           | From other professionals |           |                                     |            |                                  |           |
|                                                                                      | AOR <sup>a</sup>                                | 99% CI    | AOR <sup>a</sup>                 | 99% CI    | AOR <sup>a</sup>                   | 99% CI    | AOR <sup>a</sup>         | 99% CI    | AOR <sup>a</sup>                    | 99% CI     | AOR <sup>a</sup>                 | 99% CI    |
| Will go for professional help for serious emotional problem                          | 1.21                                            | 0.99-1.48 | 1.17                             | 0.90-1.51 | 1.14                               | 0.94-1.39 | 1.33                     | 0.89-1.98 | 1.21                                | 1.01-1.46* | 1.20                             | 0.95-1.52 |
| Comfortable talking about personal problems with a professional                      | 1.21                                            | 1.00-1.46 | 1.20                             | 0.96-1.50 | 1.12                               | 0.92-1.37 | 1.17                     | 0.80-1.70 | 1.24                                | 1.03-1.50* | 1.19                             | 0.96-1.48 |
| Embarrassed if friends knew about getting professional help                          | 1.03                                            | 0.87-1.22 | 1.05                             | 0.90-1.22 | 0.94                               | 0.81-1.10 | 1.04                     | 0.79-1.39 | 1.03                                | 0.87-1.21  | 1.04                             | 0.85-1.27 |
| What percent of people who see a professional are helped? <sup>b</sup>               | 0.97                                            | 0.89-1.05 | 0.99                             | 0.91-1.07 | 0.94                               | 0.86-1.04 | 1.02                     | 0.90-1.15 | 0.94                                | 0.87-1.03  | 0.97                             | 0.89-1.06 |
| What percent of people who do not get professional help get better? <sup>b</sup>     | 1.02                                            | 0.94-1.11 | 0.98                             | 0.89-1.07 | 1.04                               | 0.94-1.14 | 1.01                     | 0.88-1.16 | 1.00                                | 0.93-1.08  | 0.98                             | 0.88-1.08 |
| Difference in percent who get better with professional help vs. without <sup>b</sup> | 0.97                                            | 0.90-1.04 | 1.01                             | 0.95-1.08 | 0.94                               | 0.88-1.01 | 0.99                     | 0.91-1.09 | 0.95                                | 0.90-1.02  | 1.00                             | 0.92-1.08 |

**Note:** AOR stands for adjusted odds ratio, CI for confidence interval.

<sup>a</sup> Based on coefficients from logistic regression models in which each attitude/belief variable was entered into a separate model adjusting for sex, race/ethnicity, baseline age, education, employment, family income, health insurance, mood, anxiety or substance disorders, level of interference, suicidal ideations, plans or suicide attempts, professional mental health help-seeking, follow-up psychiatric disorders, interference, suicidal ideation, plans and suicide attempts.

<sup>b</sup> The AORs represent change in outcome for every 10% increments in independent variables.
